# Supplementary material for: Aluminum intercalation behaviours of {[Fe(Tp)(CN)3]2[M(H2O)2]} cyanido-bridged chain compounds in an ionic liquid electrolyte
Source: Royal Society of Chemistry journal article supplement (doi:10.1039/d4dt01316f), 2024-01-01
Supplement: d4dt01316f1.pdf [file d4dt01316f1.pdf]

## Supporting Information

### Aluminum intercalation behaviours of $\{[\text{Fe}(\text{Tp})(\text{CN})_3]_2[\text{M}(\text{H}_2\text{O})_2]\}$ cyanido-bridged chain compounds in ionic liquid electrolyte

Na Li,<sup>a,b</sup> Yanling Li,<sup>a</sup> Hans Jurgen von Bardeleben,<sup>d</sup> Damien Dambournet<sup>\*ac</sup> and Rodrigue Lescouëzec<sup>\*b</sup>

a. Sorbonne Université, CNRS, Physico-chimie des Électrolytes et Nano-Systèmes Interfaciaux, PHENIX, F-75005 Paris, France.

b. Sorbonne Université, CNRS, Institut Parisien de Chimie Moléculaire, ERMES, F-75005 Paris, France.

c. Réseau sur le Stockage Electrochimique de l'Energie (RS2E), FR CNRS 3459, 80039 Amiens, France.

d. Sorbonne Université, CNRS, Institut des Nanosciences de Paris, UMR 7588, F-75005 Paris, France.

**Table S1** Elemental analysis

|                                                                                                                                        |        | Element percentage (%) |      |       |
|----------------------------------------------------------------------------------------------------------------------------------------|--------|------------------------|------|-------|
|                                                                                                                                        |        | C                      | H    | N     |
| $\{\text{Fe}(\text{Tp})(\text{CN})_3\}_2\{\text{Ni}(\text{H}_2\text{O})_2\} \cdot 3.3\text{H}_2\text{O} \cdot 0.4\text{CH}_3\text{OH}$ | Calcd. | 34.04                  | 3.77 | 29.29 |
|                                                                                                                                        | Expt.  | 34.08                  | 3.39 | 29.16 |
| $\{\text{Fe}(\text{Tp})(\text{CN})_3\}_2\{\text{Co}(\text{H}_2\text{O})_2\} \cdot 3\text{H}_2\text{O} \cdot 0.4\text{CH}_3\text{OH}$   | Calcd. | 34.24                  | 3.72 | 29.46 |
|                                                                                                                                        | Expt.  | 34.24                  | 3.32 | 29.32 |
| $\{\text{Fe}(\text{Tp})(\text{CN})_3\}_2\{\text{Cu}(\text{DMF})\} \cdot 0.9\text{DMF} \cdot 1.2\text{H}_2\text{O}$                     | Calcd. | 38.86                  | 3.92 | 30.37 |
|                                                                                                                                        | Expt.  | 38.86                  | 3.50 | 30.21 |
| $\{\text{Fe}(\text{Tp})(\text{CN})_3\}_4\{\text{Mn}(\text{H}_2\text{O})_2\text{Mn}\} \cdot 1.2\text{DMF} \cdot 1.8\text{H}_2\text{O}$  | Calcd. | 37.38                  | 3.86 | 30.32 |
|                                                                                                                                        | Expt.  | 37.46                  | 3.46 | 30.17 |
| $\{\text{Fe}(\text{Tp})(\text{CN})_3\}_4\{\text{Zn}(\text{H}_2\text{O})_2\text{Zn}\}$                                                  | Calcd. | 37.09                  | 2.85 | 32.44 |
|                                                                                                                                        | Expt.  | 37.18                  | 2.51 | 31.89 |

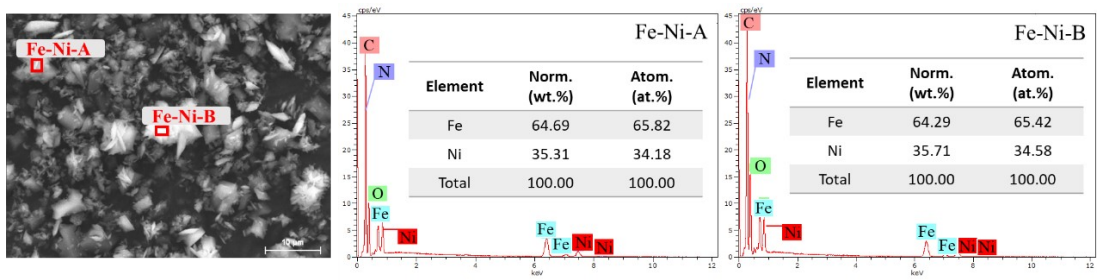

Fig. S1. EDS results for Fe-Ni product.

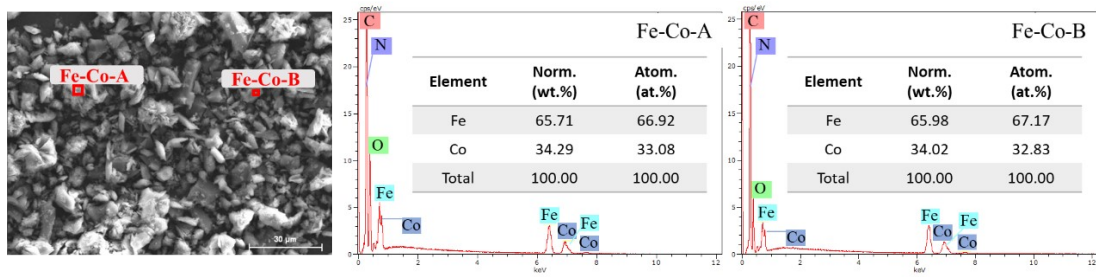

Fig. S2. EDS results for Fe-Co product.

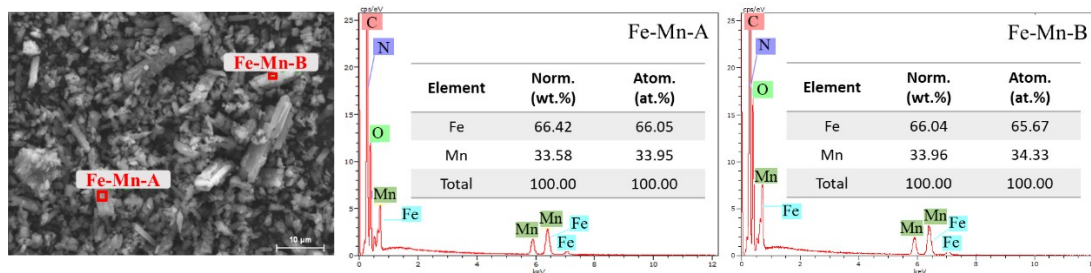

Fig. S3. EDS results for Fe-Mn product.

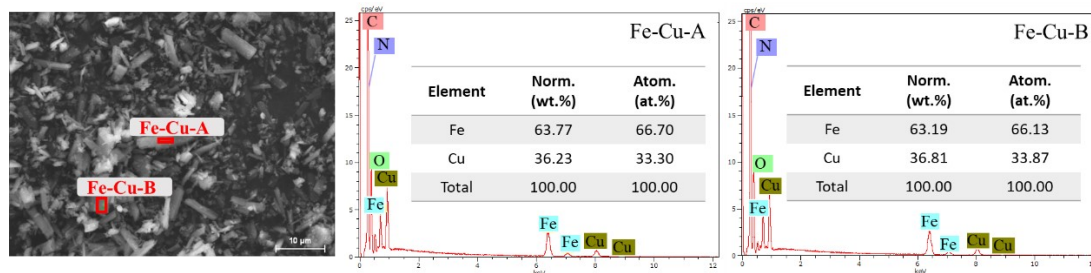

Fig. S4. EDS results for Fe-Cu product.

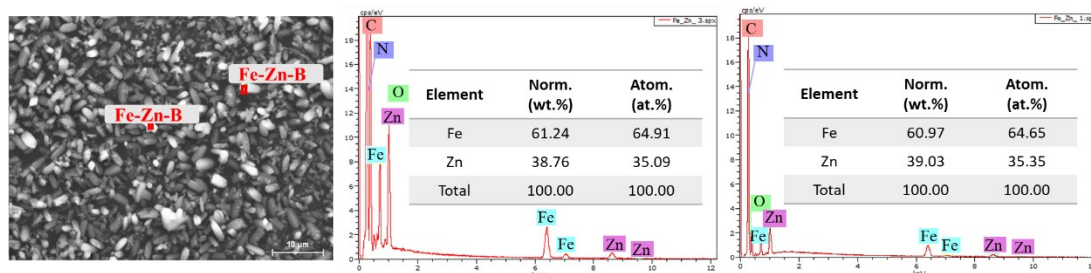

Fig. S5. EDS results for Fe-Zn product.

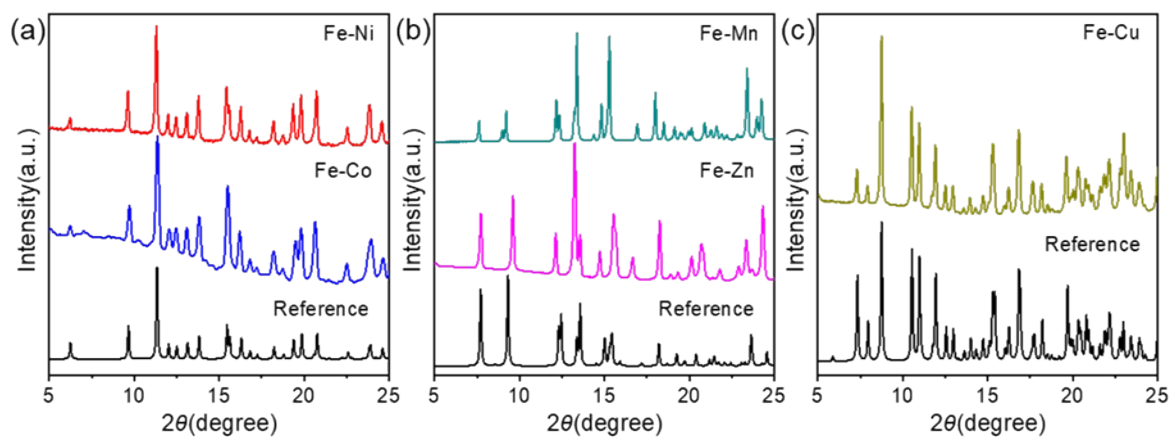

Fig. S6. Enlarged fragments of XRD patterns (a) Fe-Ni and Fe-Co, (b) Fe-Mn and Fe-Zn, (c) Fe-Cu.

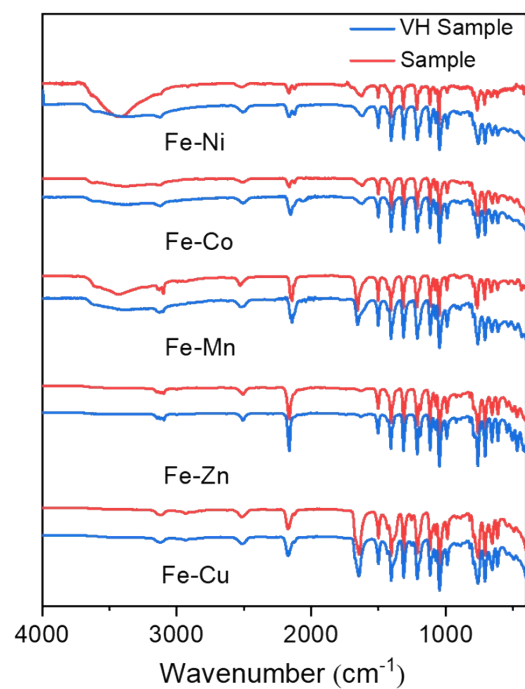

**Fig. S7.** IR spectra of compounds before and after vacuum heating (noted as VH) at 100 °C.

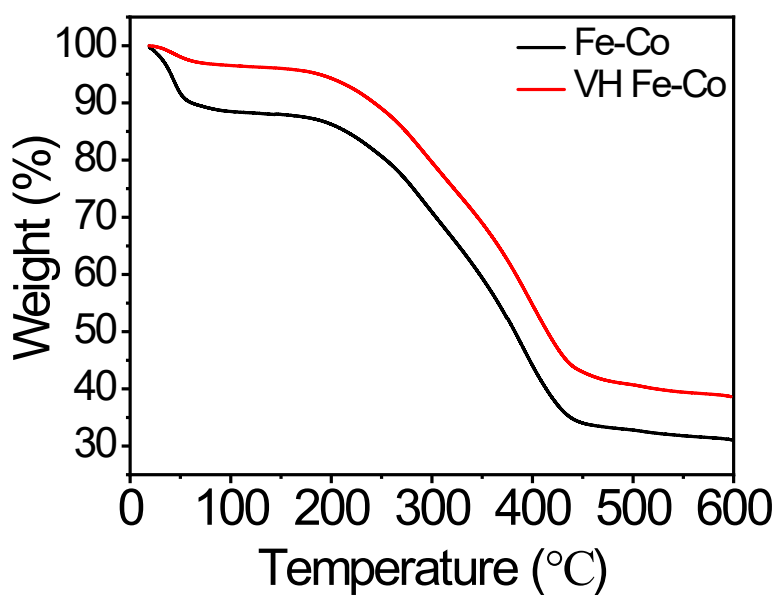

**Fig. S8.** TGA of Fe-Co and vacuum heated Fe-Co samples at 2°C/min under N<sub>2</sub> in the temperature range 2-600°C.

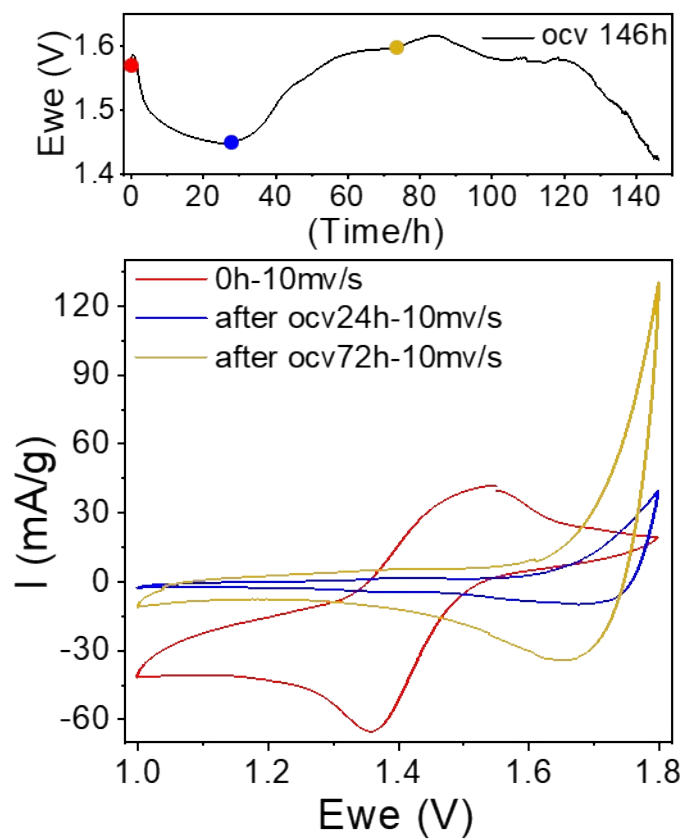

**Fig. S9.** Fe-Ni product: (a) Open Circuit Voltage (OCV); (b) Aggregate and independent curves of CVs with different delay times.

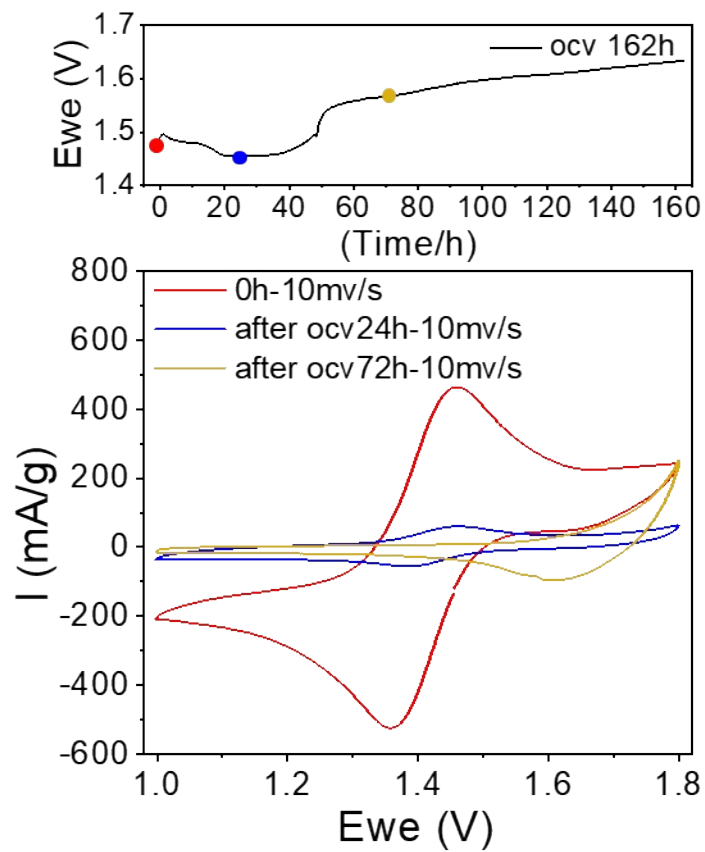

**Fig.S10.** Fe-Mn product: (a) Open Circuit Voltage (OCV); (b) Aggregate and independent curves of CVs with different delay times.

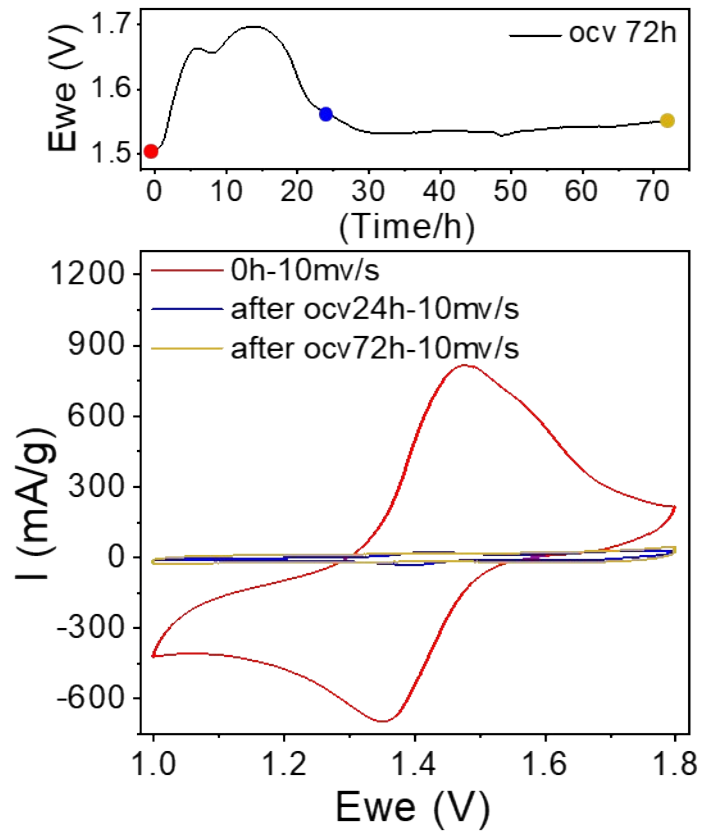

**Fig.S11.** Fe-Cu product: (a) Open Circuit Voltage (OCV); (b) Aggregate and independent curves of CVs with different delay times.
